# Supplementary material for: Stratospheric Modulation of Arctic Oscillation Extremes as Represented by Extended-Range Ensemble Forecasts
Source: Copernicus journal article supplement (doi:10.5194/wcd-2021-77), 2021-11-30
Supplement: Supplementary file 1 [file wcd-2021-77-supplement.pdf]

# Supplement

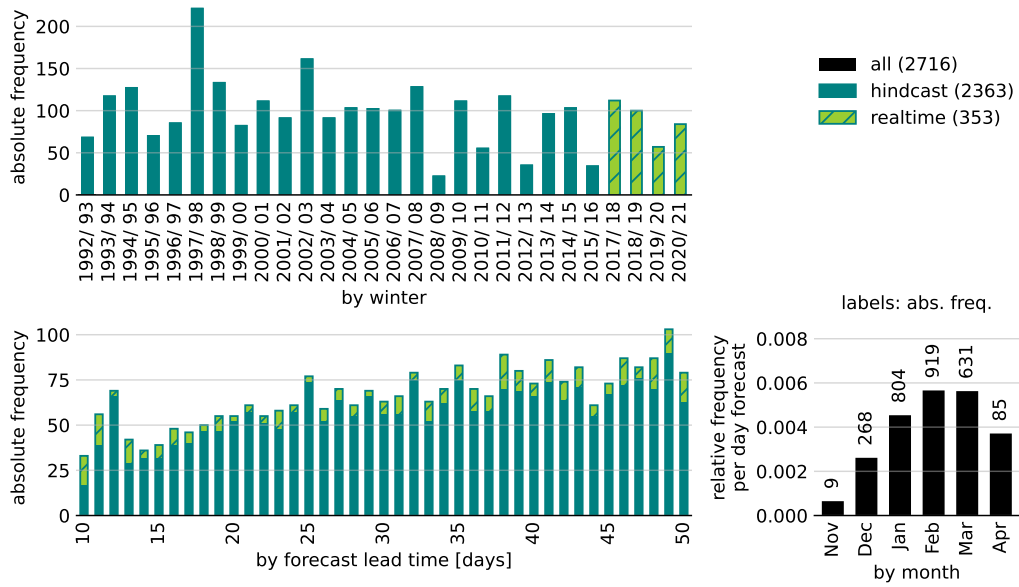

Figure S1: As in Fig. 1, for UKMO p-SSWs.

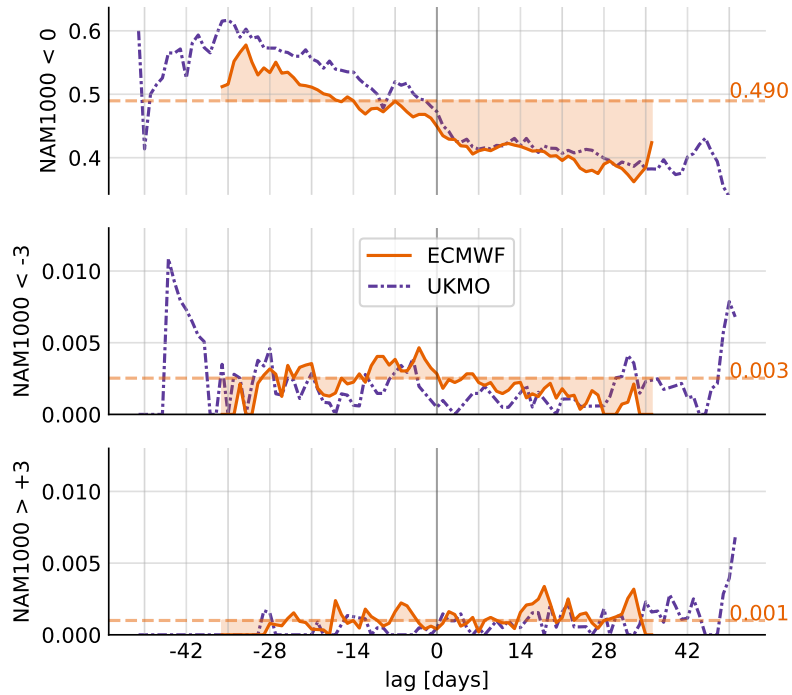

Figure S2: As in Fig. 4, for p-SPVs. Consistent with the average positive NAM1000 shift (see Fig. 9), the daily probabilities for  $NAM1000 < 0$  and  $NAM1000 < -3$  reduce, whereas the probability for  $NAM1000 > +3$  slightly increases following p-SPVs, compared to the respective climatological baselines (horizontally dashed).

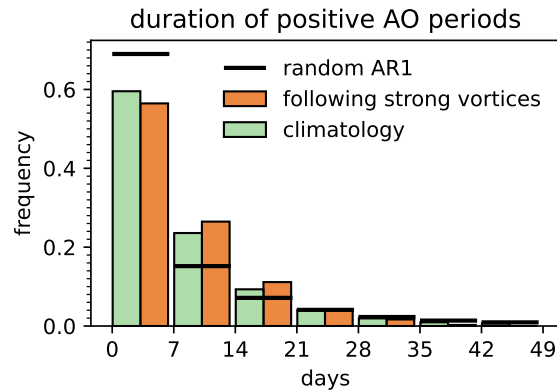

Figure S3: As in Fig. 3, for the duration of positive AO phases following p-SPVs. Compared to climatology, positive AO phases that are longer than 7 days are more likely following p-SPVs.

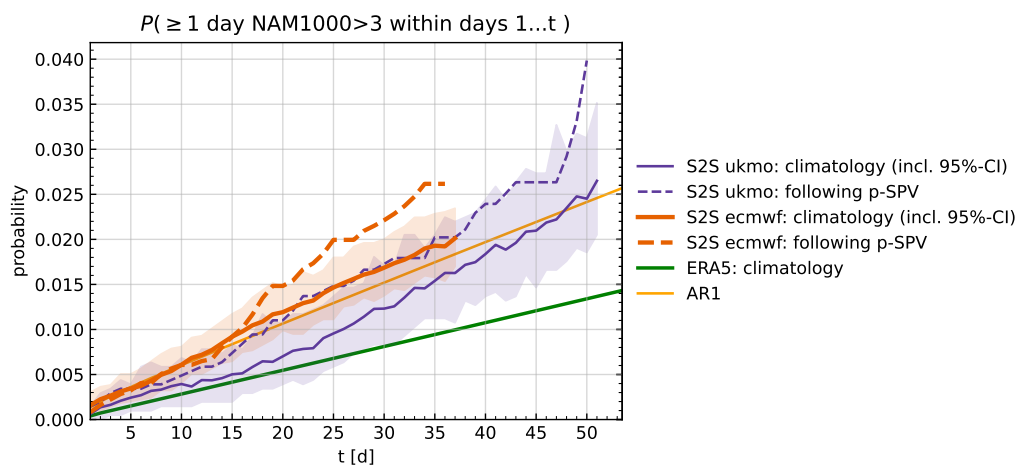

Figure S4: As in Fig. 5, for at least one day  $\text{NAM1000} > +3$  within days 1 to  $t$ , following p-SPVs. For both, ECMWF and UKMO forecasts, the probability relative to climatology is increased following p-SPVs, however, the probabilities are generally lower in the UKMO model.
